# Supplementary material
Source: PubMed Central journal article supplement (PMC10872955)
Supplement: NIHMS1940754-supplement-1.pdf [file NIHMS1940754-supplement-1.pdf]

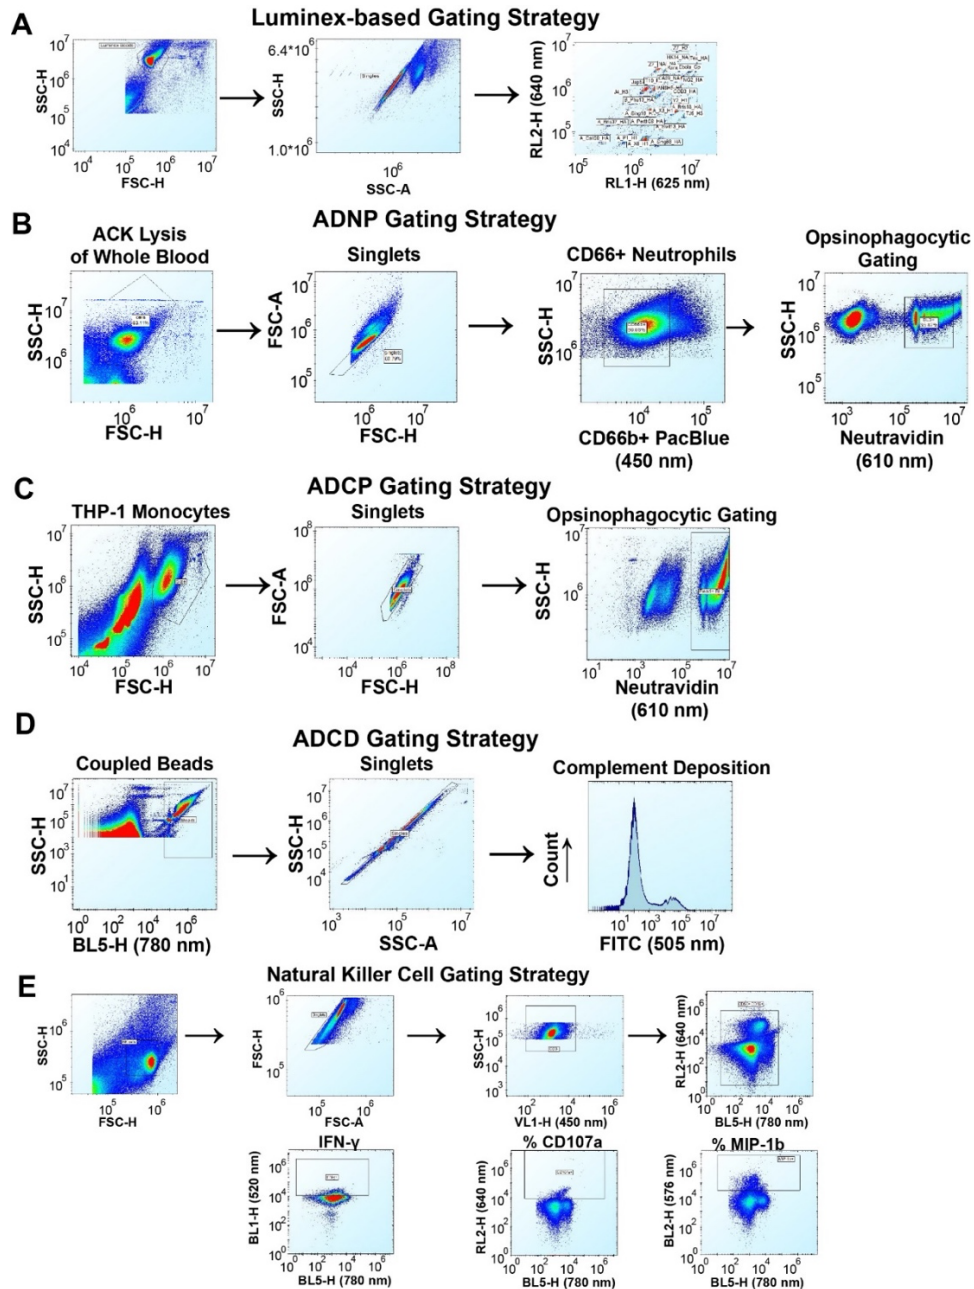

**Supplementary Figure S1. Gating Strategy for Systems Serology.** (A) Luminex-based gating strategy to determine antibody isotype and subclass binding to a target antigen. (B) Antibody-dependent neutrophil phagocytosis (ADNP) gating strategy to determine opsinophagocytic activity towards a target antigen by neutrophils. (C) Antibody-dependent cellular phagocytosis (ADCP) gating strategy to determine opsinophagocytic activity towards a target antigen by monocytes. (D) Antibody-dependent complement deposition (ADCD) gating strategy to determine the amount of complement deposited in response to a target antigen. (E) Natural killer cell activity gating strategy to determine the amount of degranulation as measured by surface CD107a expression or pro-inflammatory cytokine release as measured by interferon gamma (IFN- $\gamma$ ) and MIP-1b expression.

**Supplementary Table S2: Reagents and Resource<sup>1</sup>**

| <b>REAGENT or RESOURCE</b>                      | <b>SOURCE</b>          | <b>IDENTIFIER</b>                                                                                        |
|-------------------------------------------------|------------------------|----------------------------------------------------------------------------------------------------------|
| Anti-Human IgG1-PE                              | Southern Biotech       | HP6001                                                                                                   |
| Anti-human IgG2-PE                              | Southern Biotech       | 31-7-4                                                                                                   |
| Anti-human IgG3-PE                              | Southern Biotech       | HP6050                                                                                                   |
| Anti-human IgG4-PE                              | Southern Biotech       | HP6025                                                                                                   |
| Anti-human IgM-PE                               | Southern Biotech       | SA-DA4                                                                                                   |
| Anti-human IgA1-PE                              | Southern Biotech       | HP6025                                                                                                   |
| Anti-CD66b Pac Blue                             | BioLegend              | 305112                                                                                                   |
| Anti-CD107a                                     | BD Biosciences         | 555802                                                                                                   |
| Anti-CD3                                        | BD Biosciences         | 558117                                                                                                   |
| Anti-CD16                                       | BD Biosciences         | 557758                                                                                                   |
| Anti-CD56                                       | BD Biosciences         | 557747                                                                                                   |
| Anti-IFN $\gamma$                               | BD Biosciences         | 340449                                                                                                   |
| Anti-CCL4                                       | BD Biosciences         | 550078                                                                                                   |
| Anti-C3b                                        | MP Biomed              | 855385                                                                                                   |
| PE-Streptavidin                                 | Agilent Technologies   | PB32-10                                                                                                  |
| Guinea Pig Complement                           | Cedarlane              | CL4051                                                                                                   |
| Protein Transport Inhibitor                     | BD Biosciences         | 554724                                                                                                   |
| Brefeldin-A                                     | Sigma                  | B7651                                                                                                    |
| NHS-Sulfo-LC-LC Kit                             | ThermoFisher           | 21435                                                                                                    |
| Zebra-Spin Desalting and Chromatography Columns | ThermoFisher           | 89882                                                                                                    |
| RosetteSep NK Enrichment Kit                    | Stem Cell Technologies | 15065                                                                                                    |
| Fix & Perm Cell Permeabilization Kit            | ThermoFisher           | GAS002S-100                                                                                              |
| R Studio V 1.4.1103                             | RStudio, PBC           | Open Source                                                                                              |
| GraphPad Prism                                  | GraphPad Software, LLC | Ragon Site License                                                                                       |
| FlowJo V. 10.8                                  | FlowJo, LLC            | <a href="http://www.flowjo.com/solutions/flowjo/downloads">www.flowjo.com/solutions/flowjo/downloads</a> |
| iQue Forecyt                                    | Sartorius              | 60028                                                                                                    |
| iQue Screener Plus                              | Intellicyt/Sartorius   | 11811                                                                                                    |
| 384-well HydroSpeed Plate Washer                | Tecan                  | 30190112                                                                                                 |
| MagPlex Microspheres                            | Luminex MFG            | MC12001-01                                                                                               |
| Y-2 HI COBRA sHA                                | Ted Ross Lab           | (Cataloged by region)                                                                                    |
| Green, Fluorescent Neutravidin Microspheres     | ThermoFisher           | F8776                                                                                                    |
| Red Fluorescent Neutravidin Microspheres        | ThermoFisher           | F8775                                                                                                    |

<sup>1</sup> All the reagents and resources needed for reproducing the experiments in this study, except for antigens.

**Supplementary Table S3: Antigen List for Systems Serology<sup>2</sup>**

| <b>Antigens</b>                                  | <b>SOURCE</b>   | <b>IDENTIFIER</b>          |
|--------------------------------------------------|-----------------|----------------------------|
| A/California/07/2009 rHA wt H1N1                 | Ted Ross Lab    | 09242019CA2009H17871-P8    |
| A/P-1 COBRA rHA-H1 P1-H1                         | Ted Ross Lab    | P1-H1-7844-001             |
| A/X-6 COBRA rHA H1 X6-H1                         | Ted Ross Lab    | X6-H1-7918-001             |
| A/Singapore/6/1986 H1N1 wt rHA                   | Ted Ross Lab    | H3-7890-002                |
| A/Brisbane/59/2007 (H1N1) wt rHA                 | Ted Ross Lab    | H3-7919-005                |
| A/Perth/16/2009 H3N2 wt rHA                      | Ted Ross Lab    | H3-7975-002                |
| A/Switzerland/9715293/2013 H3N2 wt rHA           | Ted Ross Lab    | H1-7921-001                |
| A/Singapore/INFIMH-16-0019/2016 H3N2 wt rHA      | Ted Ross Lab    | 06032019SING1986H17889-T   |
| A/X-3 COBRA wt rHA                               | Ted Ross Lab    | H1-7920-001                |
| A/Brisbane/2/2018 wt rHA (H1N1)                  | Ted Ross Lab    | H1-7817-001                |
| A/TJ-5 COBRA wt rHA (H3)                         | Ted Ross Lab    | H1-20018-001               |
| A/J4 COBRA wt rHA (H3)                           | Ted Ross Lab    | H3-7916-002                |
| A/T10 COBRA wt rHA (H3)                          | Ted Ross Lab    | 05152019BRIS2007H37917-T   |
| A/NG-2 COBRA wt rHA (H3)                         | Ted Ross Lab    | 07102019Perth2009H320191-T |
| A/Texas/50/2012 wt rHA (H3N2)                    | Ted Ross Lab    | H3-20144-001               |
| Y-2 H1 COBRA sHA                                 | Ted Ross Lab    | H1-7877-002                |
| A/Japan/305/1957 wt rHA                          | Ted Ross Lab    | H1-20235-001               |
| Z-7 H2 COBRA sHA                                 | Ted Ross Lab    | TJ2-H3-7974-001            |
| A/Panama/2007/1999 wt rHA                        | Ted Ross Lab    | TJ5-H3-7976-001            |
| A/South Australia/34/2019 wt rHA                 | Ted Ross Lab    | H3-20230-001               |
| J-2 H3 COBRA sHA                                 | Ted Ross Lab    | H3-20232-001               |
| IAN-8 H5 COBRA sHA                               | Ted Ross Lab    | H3-20165-001               |
| B-COBRA-3 sHA                                    | Ted Ross Lab    | H3-20166-001               |
| B/Brisbane/60/2008 wt rHA                        | Ted Ross Lab    | H3-20227-001               |
| NA-I (N1) COBRA tetNA                            | Ted Ross Lab    | H3-20228-001               |
| A/Brisbane/59/2007 tetNA                         | Ted Ross Lab    | H3-20229-001               |
| A/California/04/2009 tetNA                       | Ted Ross Lab    | 05152019TX2012H37872-T     |
| A/Hong Kong/4801/2014 tetNA                      | Ted Ross Lab    | H3-20153-001               |
| B/Phuket3073/2013 wt rHA (Yamagata)              | Ted Ross Lab    | BY-7887-002                |
| Human Cytomegalovirus (HCMV) Glycoprotein B (gB) | Sino Biological | 10202-V08H1                |
| Ebola Virus Glyoprotein                          | IBT Bioservices | 0501-015                   |

<sup>2</sup> All the antigens needed for reproducing the assays demonstrated in this study.
